# Supplementary material for: Viral nervous necrosis in gilthead sea bream (Sparus aurata) caused by reassortant betanodavirus RGNNV/SJNNV: an emerging threat for Mediterranean aquaculture
Source: PubMed Central journal article supplement (PMC5411978; doi:10.1038/srep46755), 2017-05-02
Supplement: srep46755-s1.pdf [file srep46755-s1.pdf]

**Viral nervous necrosis in gilthead sea bream (*Sparus aurata*) caused by reassortant betanodavirus RGNNV/SJNNV: an emerging threat for Mediterranean aquaculture**

Toffan, Anna; Pascoli, Francesco; Pretto, Tobia, Panzarin, Valentina; Abbadi, Miriam; Buratin, Alessandra, Quartesan, Rosita, Gijón, Daniel and Padrós, Francesc

**Supplementing figure (S1): RNA2 Phylogenetic tree.** ML phylogenetic tree based on partial RNA2 sequences. Sea bream betanodaviruses are highlighted in bold and the country of origin is reported. The farms of provenance of the strains herein described are labeled as follows: 🏠 farm 1; 🏠 farm 2. The tree comprises also RNA2 sequences related to viruses for which the RNA1 sequence is not available or spans a different region of the polymerase gene from that used in the present study <sup>1,2</sup>. Betanodavirus genotype subdivision is displayed by labeling the branches with different colors (blue: RGNNV; green: BFNNV; yellow: TPNNV; red: SJNNV). The numbers at nodes represent bootstrap values (only values >70% are reported), while branch lengths are scaled according to the number of nucleotide substitutions per site. The scale bar is reported.

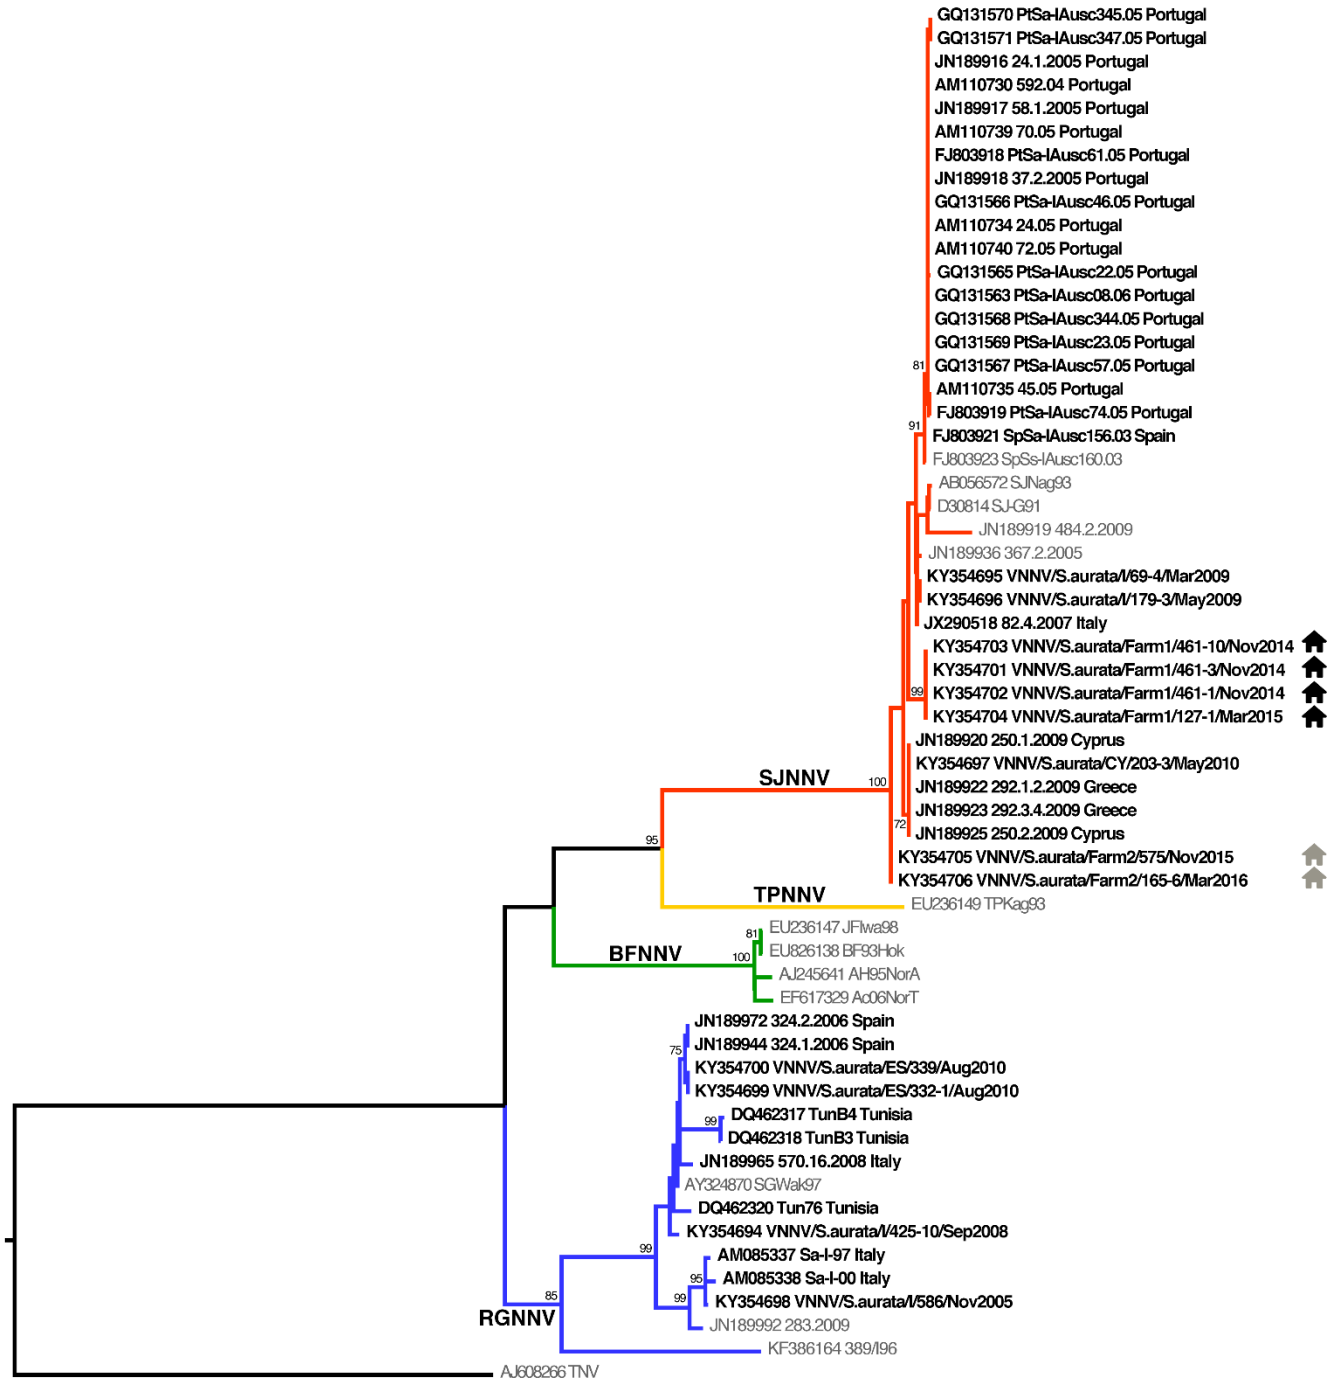

0.08

**Supplementing Table (S2): List of sea bream betanodavirus isolates included in the supplementary phylogenetic analysis.** Sea bream betanodavirus isolates included in the supplementary phylogenetic tree, that comprises also RNA2 sequences related to viruses for which the RNA1 sequence is not available or spans a different region of the polymerase gene from that used in the present study. The following information is reported: yeas of isolation, age of the specimen, fish status, country or farm of origin, presence of clinical signs, GenBank accession numbers for RNA1 and RNA2 sequences and reference.

| ID isolate       | Year | Age      | Fish status | Origin   | Clinical signs | GenBank Acc. No. |          | Genotype    | Reference |
|------------------|------|----------|-------------|----------|----------------|------------------|----------|-------------|-----------|
|                  |      |          |             |          |                | RNA1             | RNA2     |             |           |
| PtSa-IAusc345.05 | 2005 | Larvae   | Farmed      | Portugal | n.a.           | GQ131549         | GQ131570 | RGNNV/SJNNV | 1         |
| PtSa-IAusc347.05 | 2005 | Larvae   | Farmed      | Portugal | n.a.           | GQ131561         | GQ131571 | RGNNV/SJNNV | 1         |
| 592.04           | 2004 | Larvae   | Farmed      | Portugal | n.a.           | GQ131552         | AM110730 | RGNNV/SJNNV | 1,2       |
| 70.05            | 2005 | Larvae   | Farmed      | Portugal | n.a.           | GQ131562         | AM110739 | RGNNV/SJNNV | 1,2       |
| PtSa-IAusc46.05  | 2005 | Larvae   | Farmed      | Portugal | n.a.           | GQ131559         | GQ131566 | RGNNV/SJNNV | 1         |
| 24.05            | 2005 | Larvae   | Farmed      | Portugal | n.a.           | GQ131560         | AM110734 | RGNNV/SJNNV | 1,2       |
| 72.05            | 2005 | Larvae   | Farmed      | Portugal | n.a.           | GQ131547         | AM110740 | RGNNV/SJNNV | 1,2       |
| PtSa-IAusc22.05  | 2005 | Larvae   | Farmed      | Portugal | n.a.           | GQ131556         | GQ131565 | RGNNV/SJNNV | 1         |
| PtSa-IAusc08.06  | 2006 | Larvae   | Farmed      | Portugal | n.a.           | GQ131557         | GQ131563 | RGNNV/SJNNV | 1         |
| PtSa-IAusc344.05 | 2005 | Larvae   | Farmed      | Portugal | n.a.           | GQ131548         | GQ131568 | RGNNV/SJNNV | 1         |
| PtSa-IAusc23.05  | 2005 | Larvae   | Farmed      | Portugal | n.a.           | GQ131558         | GQ131569 | RGNNV/SJNNV | 1         |
| PtSa-IAusc57.05  | 2005 | Larvae   | Farmed      | Portugal | n.a.           | GQ131553         | GQ131567 | RGNNV/SJNNV | 1         |
| 45.05            | 2005 | Larvae   | Farmed      | Portugal | n.a.           | GQ131555         | AM110735 | RGNNV/SJNNV | 1,2       |
| TunB4            | 2009 | Larvae   | Farmed      | Tunisia  | Absent         | -                | DQ462317 | RGNNV       | 3         |
| TunB3            | 2009 | Larvae   | Farmed      | Tunisia  | Absent         | -                | DQ462318 | RGNNV       | 3         |
| Tun76            | 2009 | Juvenile | Farmed      | Tunisia  | Present        | -                | DQ462320 | RGNNV       | 3         |

n.a.: not available

## References:

1. Oliveira, J. G. *et al.* Comparative analysis of both genomic segments of betanodaviruses isolated from epizootic outbreaks in farmed fish species provides evidence for genetic reassortment. *J. Gen. Virol.* **90**, 2940–51 (2009).
2. Cutrín, J. M. *et al.* Emergence of pathogenic betanodaviruses belonging to the SJNNV genogroup in farmed fish species from the Iberian Peninsula. *J. Fish Dis.* **30**, 225–32 (2007).
3. Chérif, N. *et al.* Viral encephalopathy and retinopathy of *Dicentrarchus labrax* and *Sparus aurata* farmed in Tunisia. *Vet. Res. Commun.* **33**, 345–53 (2009).
